# Supplementary material for: A dual ligand synergism strategy for fabrication of highly luminescent FAPbBr3 nanocrystal films and efficient electroluminescent devices
Source: Royal Society of Chemistry journal article supplement (doi:10.1039/d4tc00996g), 2024-01-01
Supplement: d4tc00996g1.pdf [file d4tc00996g1.pdf]

## Supporting Information

# Dual Ligands Synergism Strategy for Fabrication of Highly Luminescent FAPbBr<sub>3</sub> Nanocrystal Films and Efficient Electroluminescent Devices

Cuihe Fan <sup>a</sup>, Feng Zhang <sup>b,\*</sup>, Zhengwei Cao <sup>a</sup>, Jiaqi Liu <sup>a</sup>, and Yuying Hao <sup>a,\*</sup>

<sup>a</sup> *Key Lab of Advanced Transducers and Intelligent Control System (Ministry of Education), Taiyuan University of Technology, Taiyuan 030024, China.*

<sup>b</sup> *School of Physics and Optoelectronic Engineering, Beijing University of Technology, Beijing 100124, China.*

\*Corresponding authors

*E-mail address:* [fengzhang@bjut.edu.cn](mailto:fengzhang@bjut.edu.cn) (F. Zhang), [haoyuying@tyut.edu.cn](mailto:haoyuying@tyut.edu.cn) (Y. Hao).

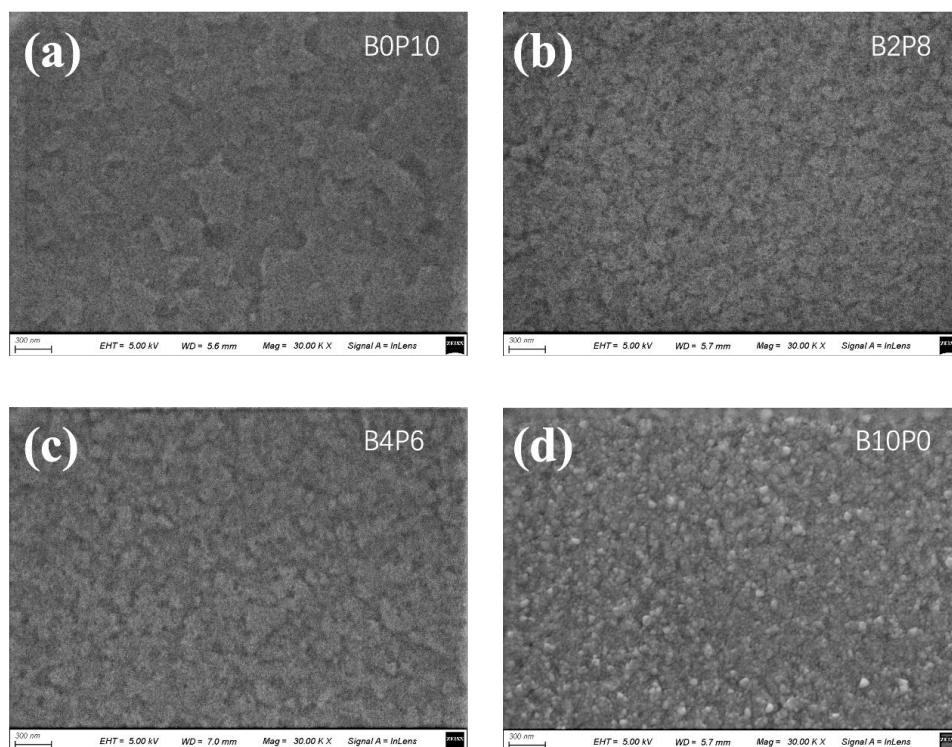

**Figure S1.** SEM images of FAPbBr<sub>3</sub> NC films of B0P10 (a), B2P8 (b), B4P6 (c), and B10P0 (d).

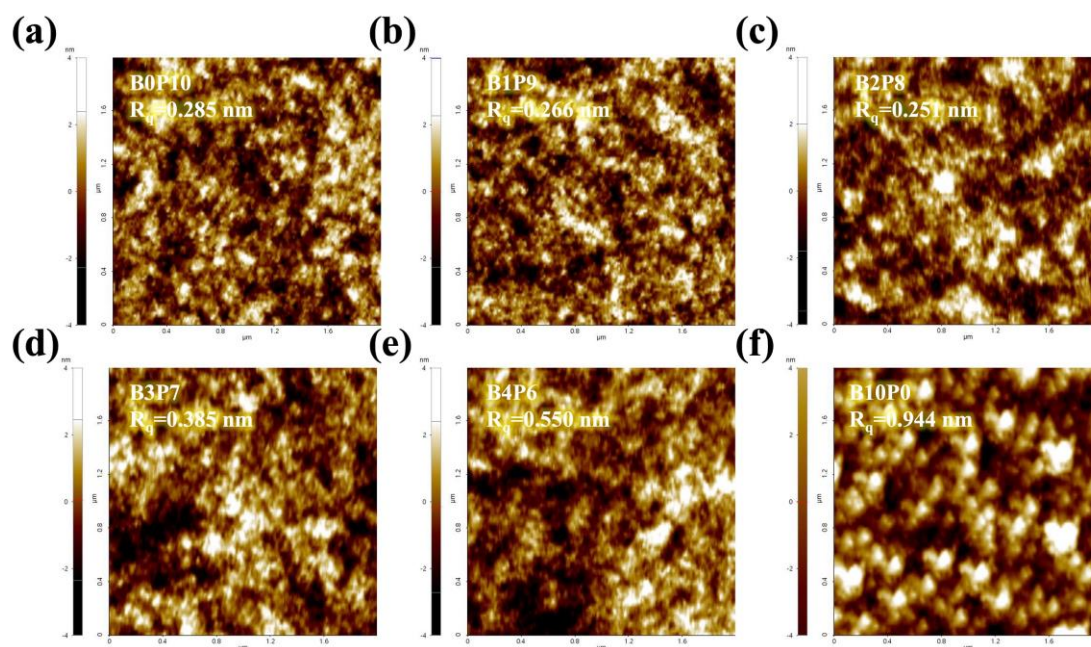

**Figure S2.** AFM images of FAPbBr<sub>3</sub> NC films of B0P10 (a), B1P9 (b), B2P8 (c), B3P7 (d), B4P6 (e) and B10P0 (f).

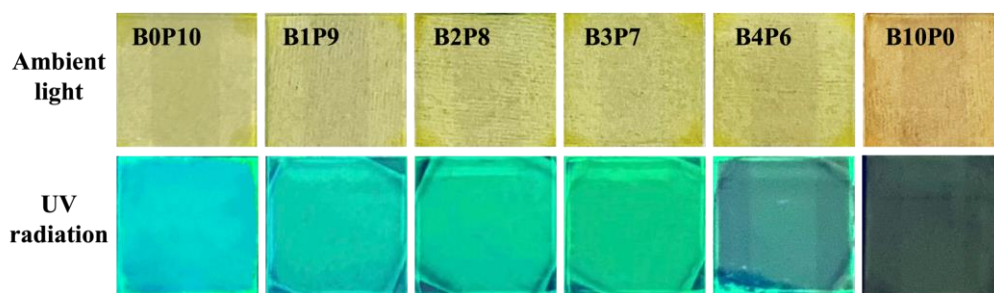

**Figure S3.** Photographs of FAPbBr<sub>3</sub> NC films with different amount of BZA and PEABr under ambient light and ultraviolet radiation (365 nm).

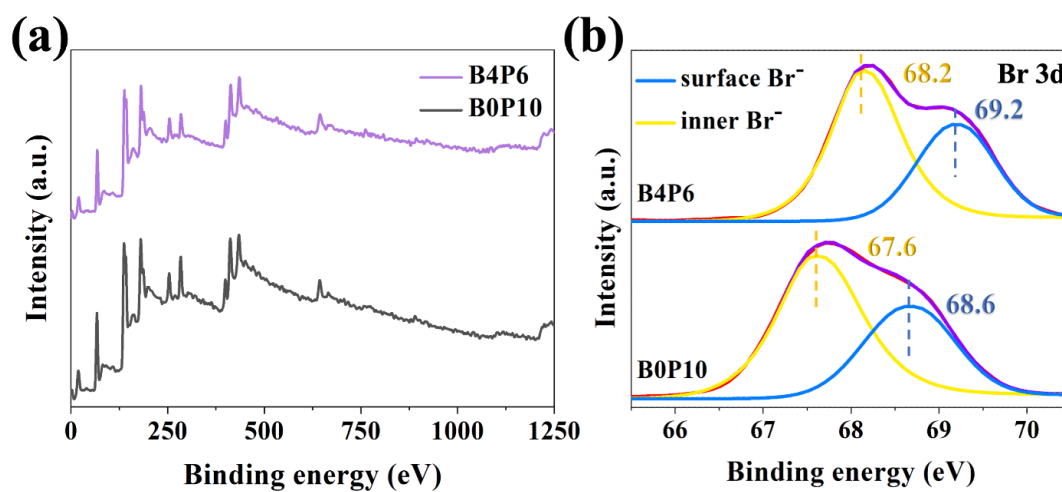

**Figure S4.** (a) XPS full spectra of B4P6 and B0P10 films. (b) XPS Br-3d spectra of B4P6 and B0P10 films.

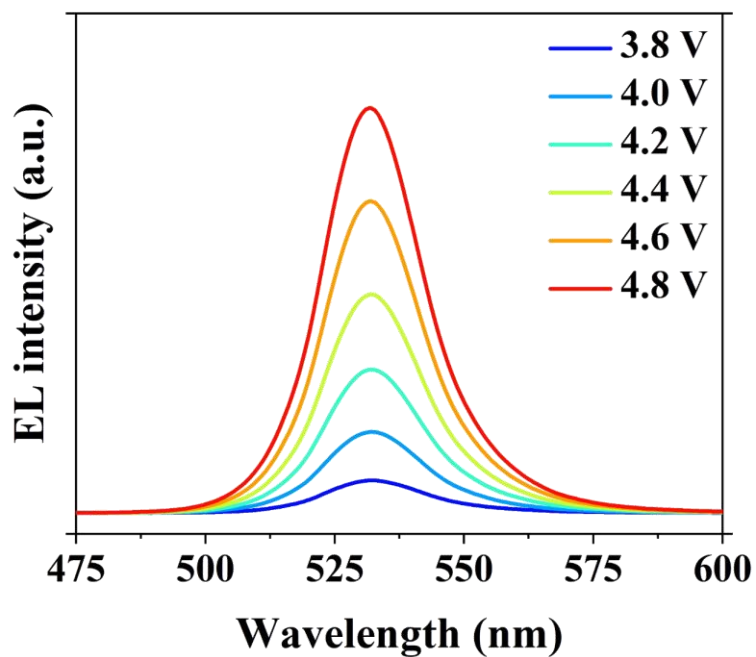

Figure S5. EL spectra of device B2P8 sample at different voltages.

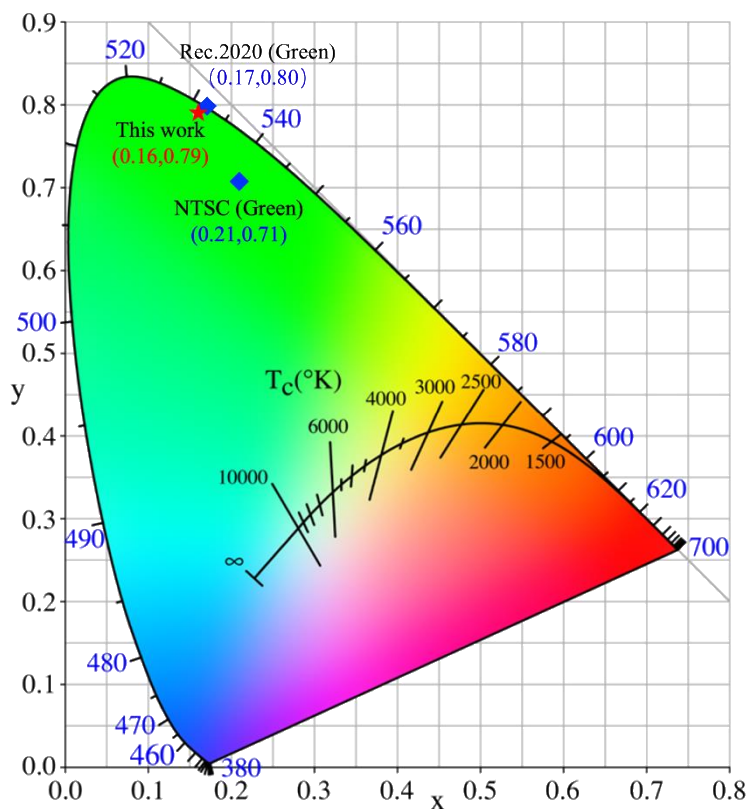

Figure S6. CIE color coordinates of device B2P8 (labeled as blue dot).

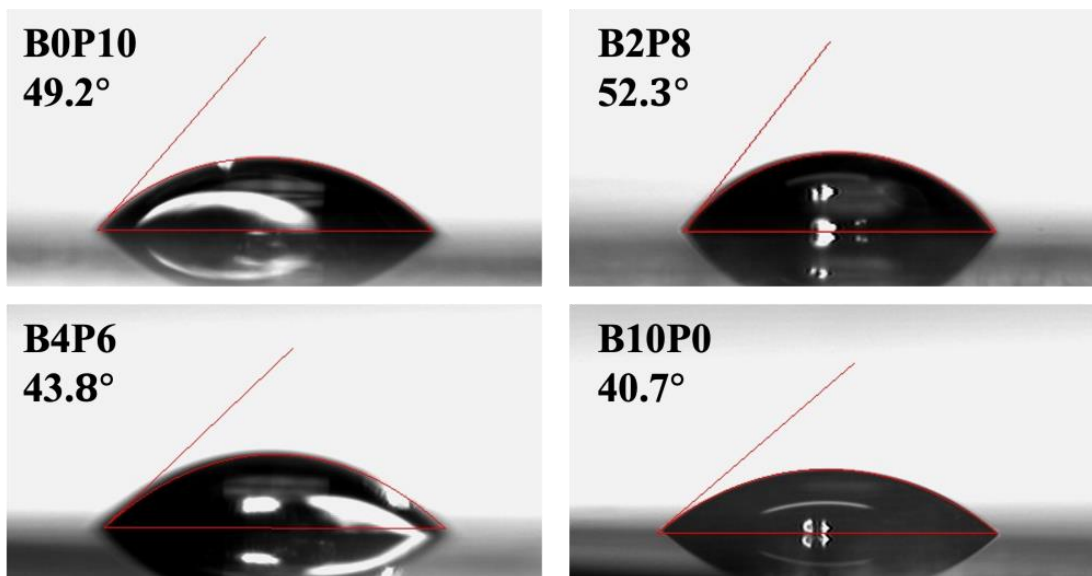

**Figure S7.** Photographs of the water contact angle for B0P10, B2P8, B4P6 and B10P0 films.

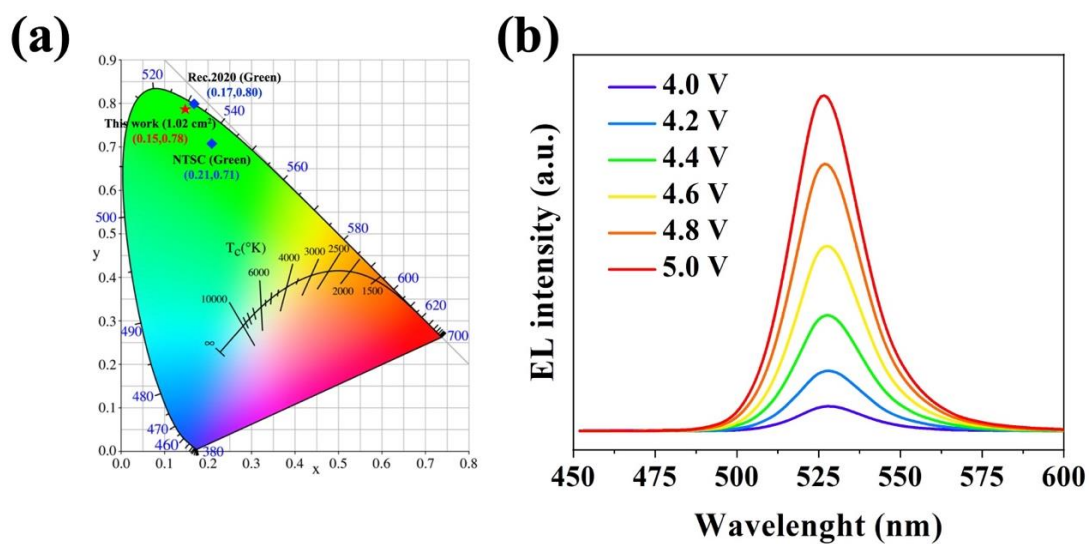

**Figure S8.** Large area PeLED photoelectric performance. (a) CIE color coordinates for large-area devices (labeled as red dot); (b) EL spectra of large area devices at different voltages.

**Table S1.** Detailed fitting results of FAPbBr<sub>3</sub> NC films with different amount of BZA and PEABr.

The TRPL data was fitted with a tri-exponential function ( $I = \sum_i A_i \exp(-t/\tau_i)$   $i = 1,2,3 \dots$ ). The

average PL lifetime was calculated through the equation ( $\tau_{avg} = \sum_i \frac{A_i \tau_i^2}{A_i \tau_i}$   $i = 1,2,3 \dots$ ).

|       | $\tau_1$ (ns) | $\tau_2$ (ns) | $\tau_3$ (ns) | $A_1$ | $A_2$ | $A_3$ | $\tau_{avg}$ (ns) |
|-------|---------------|---------------|---------------|-------|-------|-------|-------------------|
| B0P10 | 1.50          | 7.99          | 80.90         | 0.48  | 0.38  | 0.14  | 14.73             |
| B1P9  | 1.88          | 11.12         | 80.92         | 0.30  | 0.41  | 0.29  | 28.40             |
| B2P8  | 2.29          | 11.12         | 96.56         | 0.31  | 0.38  | 0.31  | 35.02             |
| B3P7  | 2.27          | 10.01         | 86.80         | 0.34  | 0.46  | 0.20  | 22.74             |
| B4P6  | 1.96          | 8.83          | 70.05         | 0.41  | 0.43  | 0.16  | 16.05             |
| B10P0 | 0.52          | 7.24          | 71.98         | 0.49  | 0.37  | 0.13  | 12.62             |

**Table S2.** The maximum luminance, CE, and EQE data of resulted PeLEDs.

|       | $L_{max}$ (cd) | $CE_{max}$ (cd/A) | $EQE_{max}$ |
|-------|----------------|-------------------|-------------|
| B0P10 | 1590           | 14.17             | 3.68        |
| B1P9  | 1813           | 26.34             | 7.08        |
| B2P8  | 5813           | 38.99             | 9.48        |
| B3P7  | 6389           | 32.76             | 7.41        |
| B4P6  | 20240          | 20.71             | 4.69        |

**Table S3.** The series resistance ( $R_s$ ), recombination resistance ( $R_{rec}$ ), and low-frequency capacitance

( $C_{LF}$ ) data of PeLEDs.

|       | $R_s$ | $C_{LF}$ ( $10^{-9}$ ) | $R_{rec}$ |
|-------|-------|------------------------|-----------|
| B0P10 | 38.05 | 5.706                  | 11249     |
| B1P9  | 32.6  | 5.449                  | 9402      |
| B2P8  | 52.26 | 23.28                  | 6825      |
| B3P7  | 33.29 | 5.398                  | 7946      |
| B4P6  | 32.05 | 7.244                  | 13917     |
| B10P0 | 97.76 | 6.333                  | 23936     |

**Table S4.** The device structure of single carrier devices.

|                         |       | Device structure          |
|-------------------------|-------|---------------------------|
| Single electron Devices | B0P10 | ITO/TPBi/PVK/TPBiAl       |
|                         | B2P8  | ITO/TPBi/PVK/TPBi/Al      |
| Single Hole Devices     | B0P10 | ITO/PEDOT:PSS/PVK/PTAA/Al |
|                         | B2P8  | ITO/PEDOT:PSS/PVK/PTAA/Al |
